# Supplementary material for: Challenges in conducting fractional polynomial and standard parametric network meta-analyses of immune checkpoint inhibitors for first-line advanced renal cell carcinoma
Source: Atypon-hosted journal article supplement (doi:10.57264/cer-2023-0004), 2023-07-11
Supplement: supplementary material.docx [file supplementary%20material.docx]

# Appendix: Challenges in conducting fractional polynomial and standard parametric network meta-analyses of immune checkpoint inhibitors for first-line advanced renal cell carcinoma

Table of Contents

[Appendix: Challenges in the time-varying hazard NMA of immune checkpoint inhibitors for first-line advanced renal cell carcinoma 1](#_Toc127193959)

[1 Feasibility assessment 4](#_Toc127193960)

[1.1 Heterogeneity assessment 4](#_Toc127193961)

[1.1.1 Items assessed for heterogeneity between trials 4](#_Toc127193962)

[1.1.2 Overview of relevant baseline characteristics across trials 5](#_Toc127193963)

[1.2 Assessment of the proportional hazards (PH) assumption 6](#_Toc127193964)

[1.2.1 Criteria applied 6](#_Toc127193965)

[1.2.2 Results 7](#_Toc127193966)

[1.3 Network of evidence 8](#_Toc127193967)

[2 Non-proportional hazards NMA outcomes 9](#_Toc127193968)

[2.1 Model fitting 9](#_Toc127193969)

[2.2 Model selection algorithm: face validity check of first- and second-order models 11](#_Toc127193970)

[2.2.1 Time-varying HR plots versus trial hazards second order polynomial for OS 11](#_Toc127193971)

[2.3 Model selection algorithm: Predictive accuracy against trial data 22](#_Toc127193972)

[2.3.1 PFS 23](#_Toc127193973)

[2.3.2 OS 29](#_Toc127193974)

[References 31](#_Toc127193975)

**Table of abbreviations**

CI Confidence interval

CrI Credible interval

DIC Deviance information criterion

GT Grambsch and Therneau

HR Hazard ratio

IMDC International Metastatic RCC Database Consortium

MSKCC Memorial Sloan Kettering Cancer Center score

NMA Network Meta Analysis

OS Overall Survival

PFS Progression free survival

PH Proportional hazards

RCC Renal cell carcinoma

SD Standard deviation

SUN Sunitinib

# Feasibility assessment

## Heterogeneity assessment

### Items assessed for heterogeneity between trials

Table 1 PICOS items for similarity assessment

| **PICOS item** | **Evaluated information** |
| --- | --- |
| Patient characteristics | - Age - Sex - ECOG-PS - MSKCC score / IMDC score - Prior nephrectomy - Prior use of radiation therapy - PD-L1 status - Metastatic sites   - Number of metastatic sites   - Location of metastatic sites - Race - Region |
| Intervention | - Treatment dose and regimen |
| Comparator |
| Outcome definition | - Definition of PFS - Stratified vs. unstratified results |
| Study characteristics | - Study phase - Number of patients - Study aim - Study design (for example, cross-over design) - Follow-up duration |

ECOG-PS, Eastern Cooperative Oncology Group Performance Status; IMDC, International Metastatic RCC Database Consortium score; MSKCC, Memorial Sloan Kettering Cancer Center score

### Overview of relevant baseline characteristics across trials

| Study | Trial name | Treatment | Dose | Regimen | n | % ECOG 0 | % IMDC score  Favorable | % IMDC score  Intermediate | % IMDC score  Poor | % Prior nephric-tomy | % Prior radiation therapy | % PD-L1 expression ≥ 1% cut-off | % ≥2 metastatic sites |
| --- | --- | --- | --- | --- | --- | --- | --- | --- | --- | --- | --- | --- | --- |
| Choueiri 2021[1] | CheckMate 9ER | NIV+CAB | NIV: 240 mg  CAB: 40 mg | Every 2 weeks  Once daily | 323 | 80 | 23 | 58 | 19 | 69 | 14 | 25 | 81 |
| SUN | 50 mg | 6-week cycle: once daily (4wk) + no treatment (2wk) | 328 | 74 | 22 | 57 | 21 | 71 | 14 | 25 | 78 |
| Motzer 2019[2] | JAVELIN Renal 101 | AVE+AXI | AVE: 10mg/kg  AXI: 5 mg | Every 2 weeks  Twice daily | 442 | 63 | 21 | 61 | 16 | 80 | NR | 61 | NR |
| SUN | 50 mg | 6-week cycle: once daily (4wk) + no treatment (2wk) | 444 | 63 | 22 | 62 | 16 | 80 | NR | 65 | NR |
| Rini 2019[3] | KEYNOTE-426 | PEM+AXI | PEM: 200 mg  AXI: 5 mg | Every 3 weeks  Every 2 days | 432 | NR | 32 | 55 | 13 | 83 | 10 | 56 | 73 |
| SUN | 50 mg | 6-week cycle: once daily (4wk) + no treatment (2wk) | 429 | NR | 30 | 57 | 12 | 83 | 9 | 59 | 77 |
| Motzer 2021[4]  CLEAR | CLEAR | PEM+LEN | PEM: 200 mg  LEN: 20 mg | 3-week cycle: once daily  Every 3 weeks | 355 | NR | 31 | 59 | 9 | 74 | NR | 30 | 72 |
| SUN | 50 mg | 6-week cycle: once daily (4wk) + no treatment (2wk) | 357 | NR | 35 | 54 | 10 | 77 | NR | 33 | 69 |

## Assessment of the proportional hazards (PH) assumption

### Criteria applied

- Log-cumulative hazard plots
  - A hazard plot of the log (cumulative hazard) against log (time (months)) is used to assess proportionality of hazards of progression/mortality over
  - Crossing of hazards in the plot can indicate that the proportional hazards assumption may be violated, however also a marked divergence from the parallel can indicate that the PH does not hold
- Schoenfeld residuals test
  - Testing for time-dependency of the hazard ratio (HR) is equivalent to testing for a non-zero slope in a generalized linear regression of the scaled Schoenfeld residuals over time
  - A non-zero slope or the log (HR) not falling within the 95% confidence interval (CI) bands indicates a potential violation of the PH assumption
- Grambsch and Therneau (GT) test
  - Assesses whether the slope in a generalized linear regression of the scaled Schoenfeld residuals over time is zero
  - If the p-value is significant (<0.05), it can be viewed as a potential violation of the PH assumption
- Decision criteria
  - When the 2 visual inspection plots provided conflicting results, the final decision on whether the PH assumption was violated was based upon the result of the GT test
  - If a significant number of trials within the networks of evidence violated the PH assumption, a non-proportional hazards NMA was recommended as an alternative approach

### Results

Table 2. Results from testing the PH assumption

| Study | Trial | Treatment | Grambsch Therneau test (violation [p-value]) | Schoenfeld residuals test (Non-zero slope) | Log-cumulative hazard plots (Crossing curves) | Violates PH assumptiona |
| --- | --- | --- | --- | --- | --- | --- |
|  |  |  | Violation of PH assumption for PFS | | | |
| IPD | CheckMate 9ER  (DBL July 2021) | NIV+CAB | Yes [0.027] | Yes | Yes | Yes |
| SUN |
| Choueiri  2020[5] | JAVELIN Renal 101 | AVE+AXI | No [0.931] | No | Yes | No |
| SUN |
| Rini 2021[6] | KEYNOTE-426 | PEM+AXI | No [0.892] | No | No | No |
| SUN |
| Motzer 2021[4] | CLEAR | SUN | Yes [0.047] | Yes | Yes | Yes |
| PEM+LEN |
|  |  |  | Violation of PH assumption for OS | | | |
| IPD | CheckMate 9ER  (DBL July 2021) | NIV+CAB | Yes [0.016] | Yes | Yes | Yes |
| SUN |
| Choueiri  2020[5] | JAVELIN Renal 101 | AVE+AXI | No [0.4216] | No | Yes | No |
| SUN |
| Rini 2021[6] | KEYNOTE-426 | PEM+AXI | Yes [0.0270] | Yes | Yes | Yes |
| SUN |
| Motzer 2021[4] | CLEAR | SUN | Yes [0.0012] | Yes | Yes | Yes |
| PEM+LEN |

a Decision was made on violation in 2 of the 3 tests.

## Network of evidence


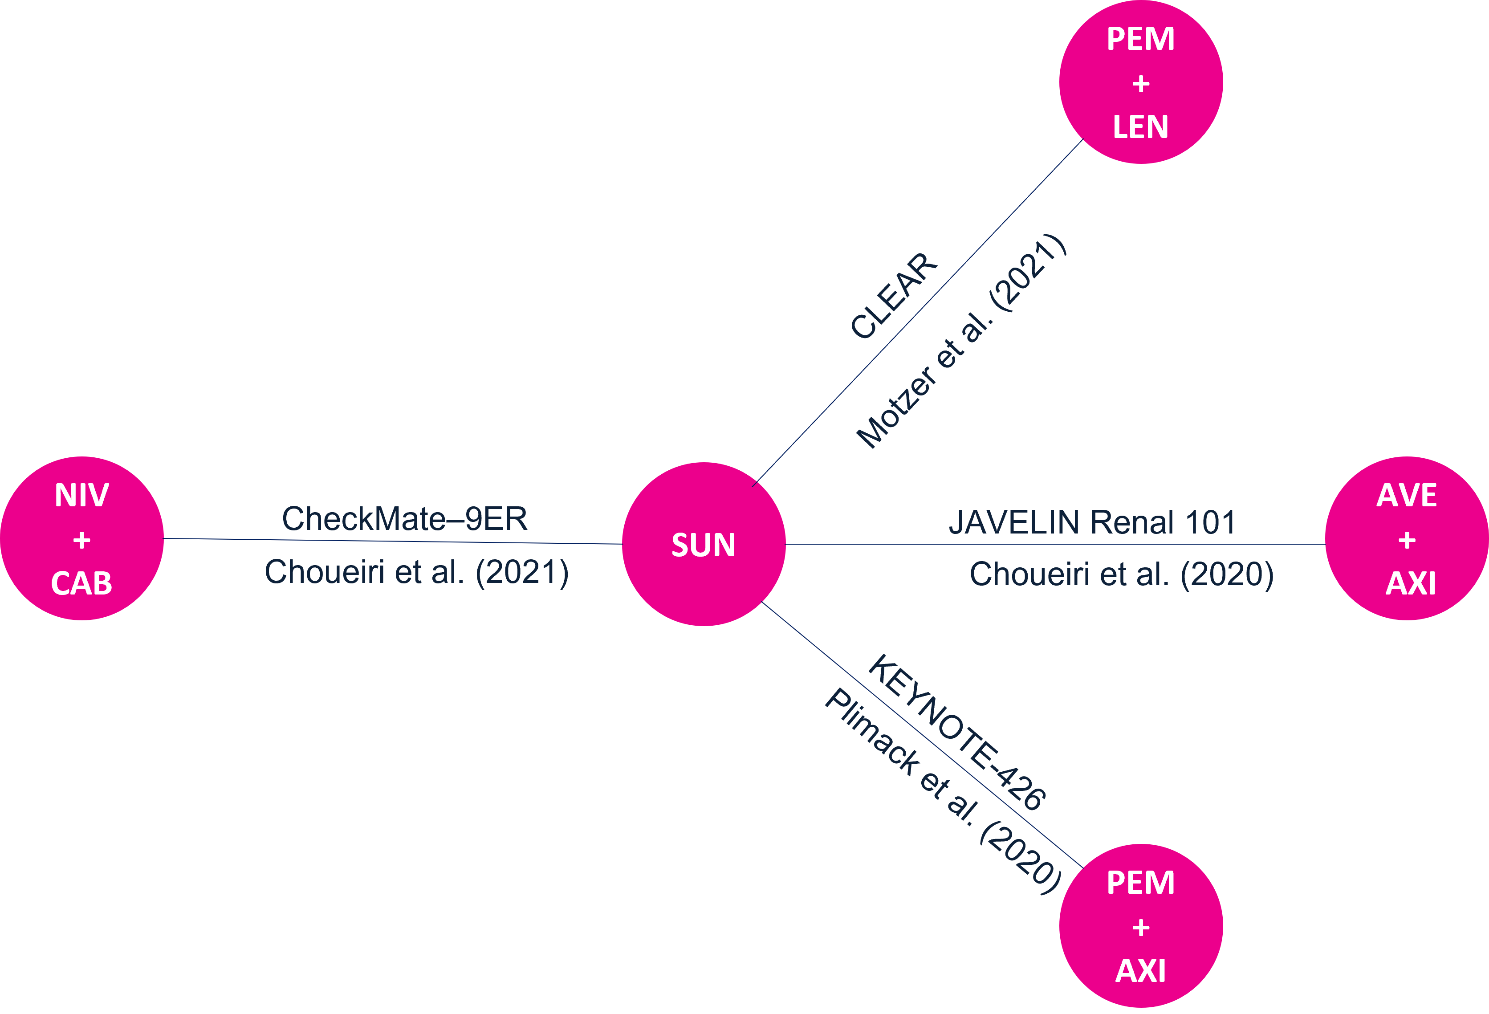


Figure 1: Network of evidence for OS and PFS

A

B


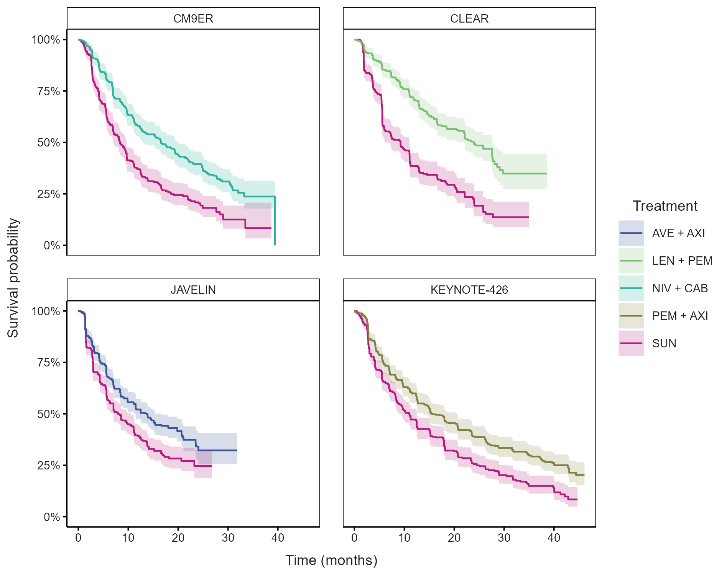

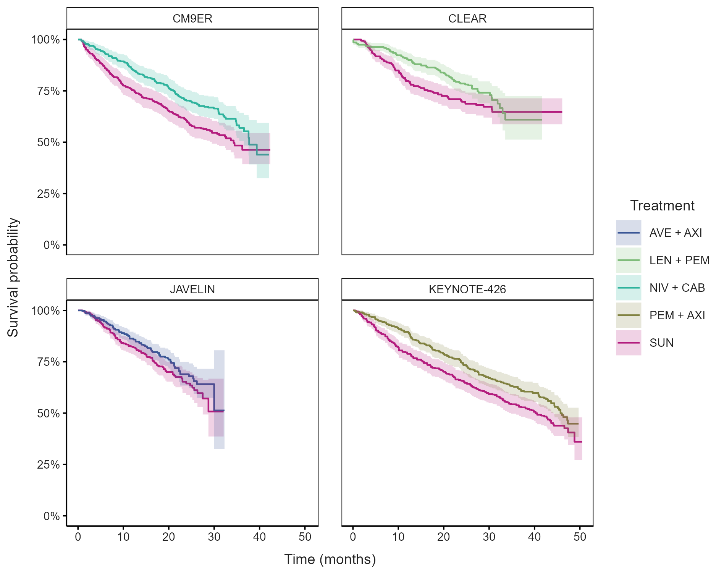


Figure 2. Input data based on (pseudo)-IPD for (A) PFS and for (B) OS

# Non-proportional hazards NMA outcomes

## Model fitting

The analysis was conducted in R and executed using the software package Stan[7] using four chains with N=3500 iterations per chain of which N=1750 were used for burn-in.

Table 3. DIC model fits

| Model | OS | PFS |
| --- | --- | --- |
| FP(-2) (fixed effects) | 228.5539 | 361.5619 |
| FP(-2,-2) (fixed effects) | 222.5972 | 268.6800 |
| FP(-2,-1) (fixed effects) | 215.1445 | 268.7387 |
| FP(-2,-0.5) (fixed effects) | 207.5568 | 274.1631 |
| FP(-2,0) (fixed effects) | 205.0474 | 283.6895 |
| FP(-2,0.5) (fixed effects) | 202.6927 | 296.9649 |
| FP(-2,1) (fixed effects) | 201.8812 | 310.9834 |
| FP(-2,2) (fixed effects) | Not converging | 337.3401 |
| FP(-1) (fixed effects) | 227.7378 | 377.6337 |
| FP(-1,-1) (fixed effects) | 207.1239 | 278.3008 |
| FP(-1,-0.5) (fixed effects) | 211.3478 | 286.6596 |
| FP(-1,0) (fixed effects) | 206.3537 | 301.3737 |
| FP(-1,0.5) (fixed effects) | 206.1599 | 316.9097 |
| FP(-1,1) (fixed effects) | 207.0309 | 333.3391 |
| FP(-1,2) (fixed effects) | Not converging | 359.5024 |
| FP(-0.5) (fixed effects) | 225.4133 | 380.6506 |
| FP(-0.5,-0.5) (fixed effects) | 207.3684 | 299.8550 |
| FP(-0.5,0) (fixed effects) | 209.3095 | 313.3352 |
| FP(-0.5,0.5) (fixed effects) | 208.9233 | 331.1895 |
| FP(-0.5,1) (fixed effects) | 209.7561 | 347.0343 |
| FP(-0.5,2) (fixed effects) | Not converging | 370.3001 |
| FP(0) (fixed effects) | 222.0661 | 378.0990 |
| FP(0,0) (fixed effects) | 209.8433 | 330.7859 |
| FP(0,0.5) (fixed effects) | 211.6640 | 346.4398 |
| FP(0,1) (fixed effects) | 212.9932 | 360.8262 |
| FP(0,2) (fixed effects) | Not converging | 379.8799 |
| FP(0.5) (fixed effects) | 218.5230 | 373.2221 |
| FP(0.5,0.5) (fixed effects) | 213.4884 | 360.5627 |
| FP(0.5,1) (fixed effects) | 215.6279 | 371.6328 |
| FP(0.5,2) (fixed effects) | Not converging | 383.8631 |
| FP(1) (fixed effects) | 216.3228 | 371.2471 |
| FP(1,1) (fixed effects) | 216.9066 | 378.6368 |
| FP(1,2) (fixed effects) | Not converging | 382.3083 |
| FP(2) (fixed effects) | Not converging | 376.2310 |
| FP(2,2) (fixed effects) | Not converging | 375.3668 |
| loglogistic (fixed effects) | 230.9017 | 336.3549 |
| lognormal (fixed effects) | 242.3480 | 321.1411 |

Table 4. Non-converging models

|  | OS | | PFS | |
| --- | --- | --- | --- | --- |
| Model | DIC | Number of non-converging parameters (R-hat>1.2) | DIC | Number of non-converging parameters (R-hat>1.2) |
| FP(3) (fixed effects) | 65786.25 | 18 | 909.09 | 16 |
| FP(3,-2) (fixed effects) | 59428.00 | 28 | 897.49 | 25 |
| FP(3,-1) (fixed effects) | 62234.62 | 26 | 898.36 | 30 |
| FP(3,-0.5) (fixed effects) | 69639.78 | 30 | 949.32 | 28 |
| FP(3,0) (fixed effects) | 691520.37 | 35 | 7441.60 | 32 |
| FP(3,0.5) (fixed effects) | 474928.90 | 33 | 7900.32 | 36 |
| FP(3,1) (fixed effects) | 460183.94 | 35 | 7343.99 | 37 |
| FP(3,2) (fixed effects) | 126096.23 | 37 | 68024.78 | 28 |
| FP(3,3) (fixed effects) | 34230.47 | 31 | 135178.02 | 31 |
| FP(-0.5,2) (fixed effects) | 35445.65 | 22 | - | - |
| FP(-1,2) (fixed effects) | 35480.66 | 22 | - | - |
| FP(-2,2) (fixed effects) | 35479.88 | 22 | - | - |
| FP(0,2) (fixed effects) | 35376.40 | 22 | - | - |
| FP(0.5,2) (fixed effects) | 35327.19 | 23 | - | - |
| FP(1,2) (fixed effects) | 34781.28 | 24 | - | - |
| FP(2) (fixed effects) | 35485.48 | 14 | - | - |
| FP(2,2) (fixed effects) | 42859.41 | 24 | - | - |

## Model selection algorithm: face validity check of first- and second-order models

### Time-varying HR plots versus trial hazards second order polynomial for OS

During the face validity check of the converging models, the second-order models for OS have been excluded as these showed extremely variable and implausible time-varying HRs, mostly for the PEM+LEN arm. Time-varying HR plots versus trial hazards after anchoring, for the excluded second-order OS models are shown in Figure 3 to Figure 23.


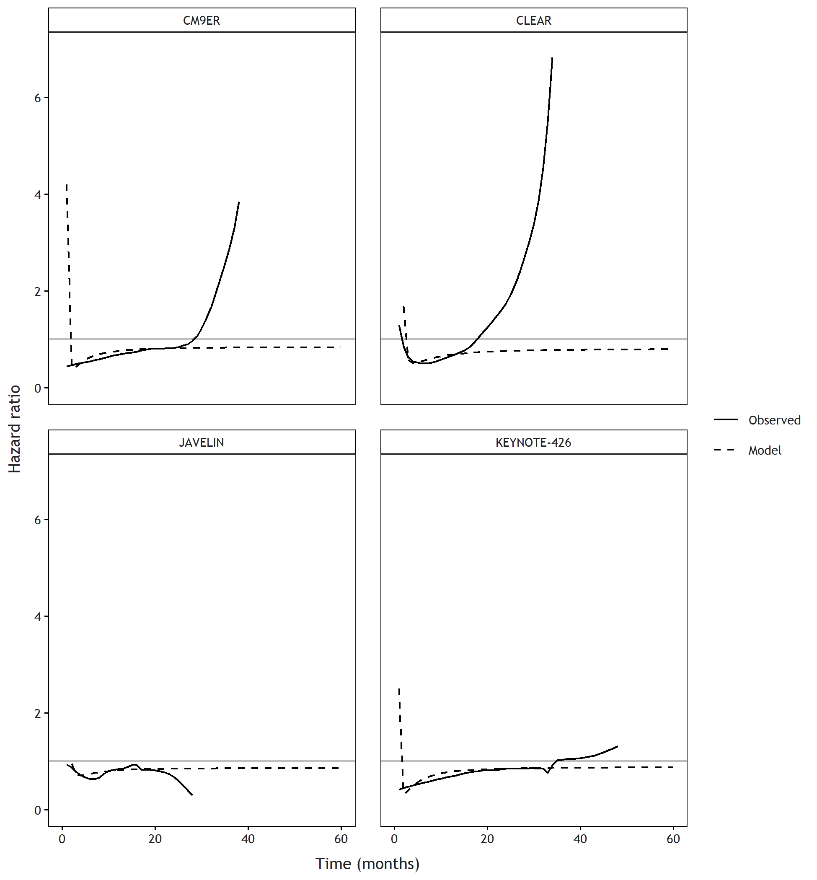


Figure 3: FP(-2,-2) (fixed effects).


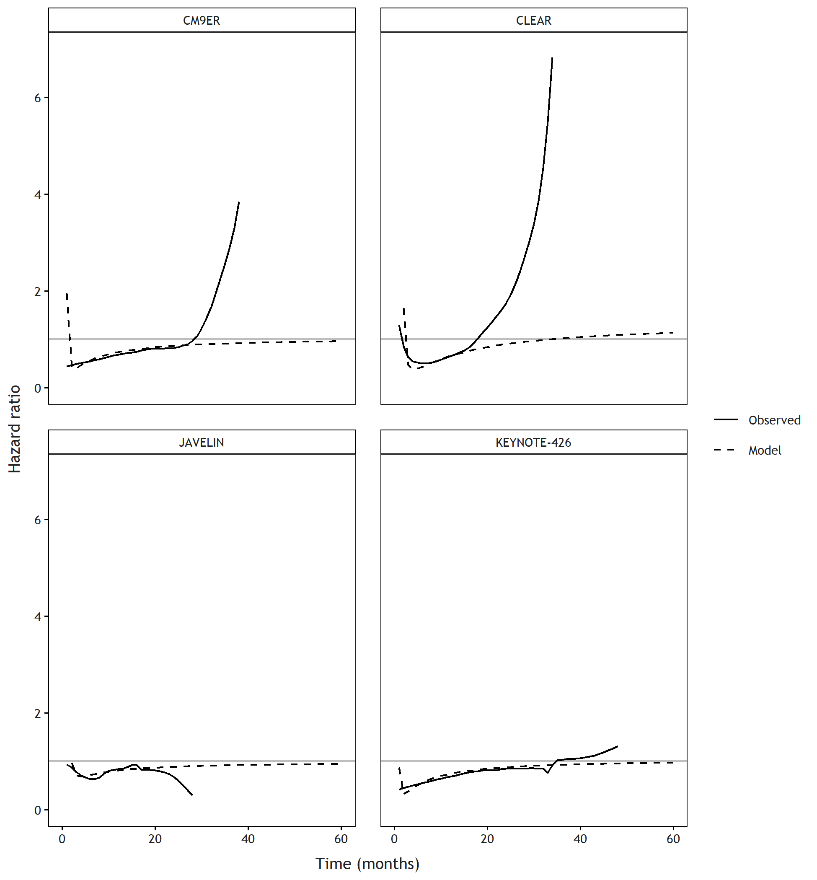


Figure 4: FP(-2,-1) (fixed effects).


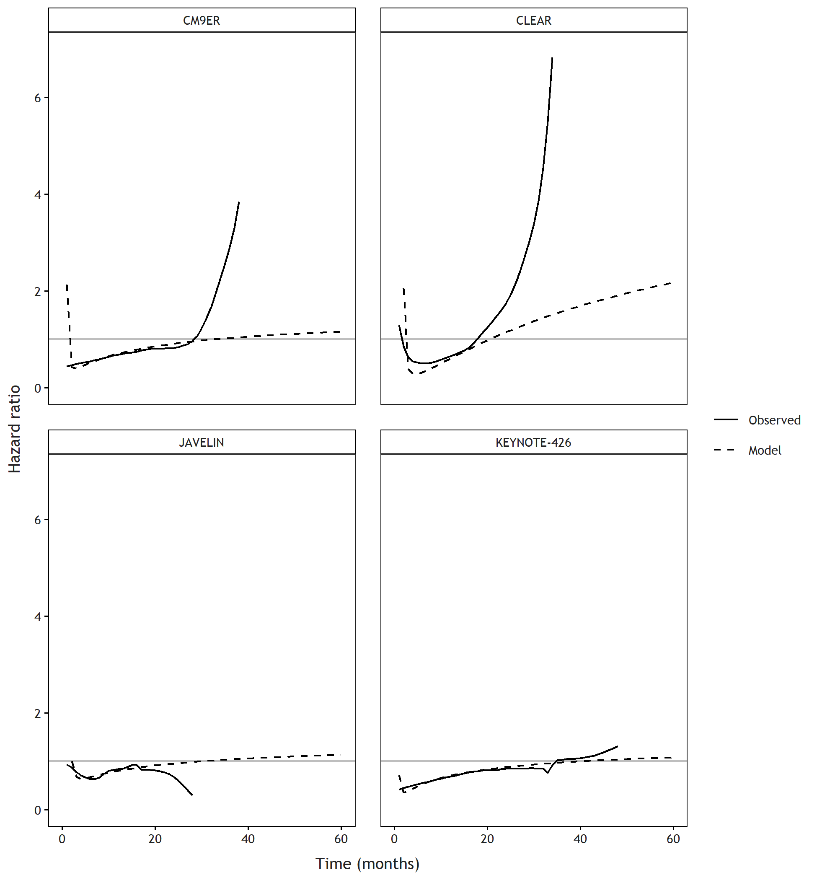


Figure 5: FP(-2,-0.5) (fixed effects).


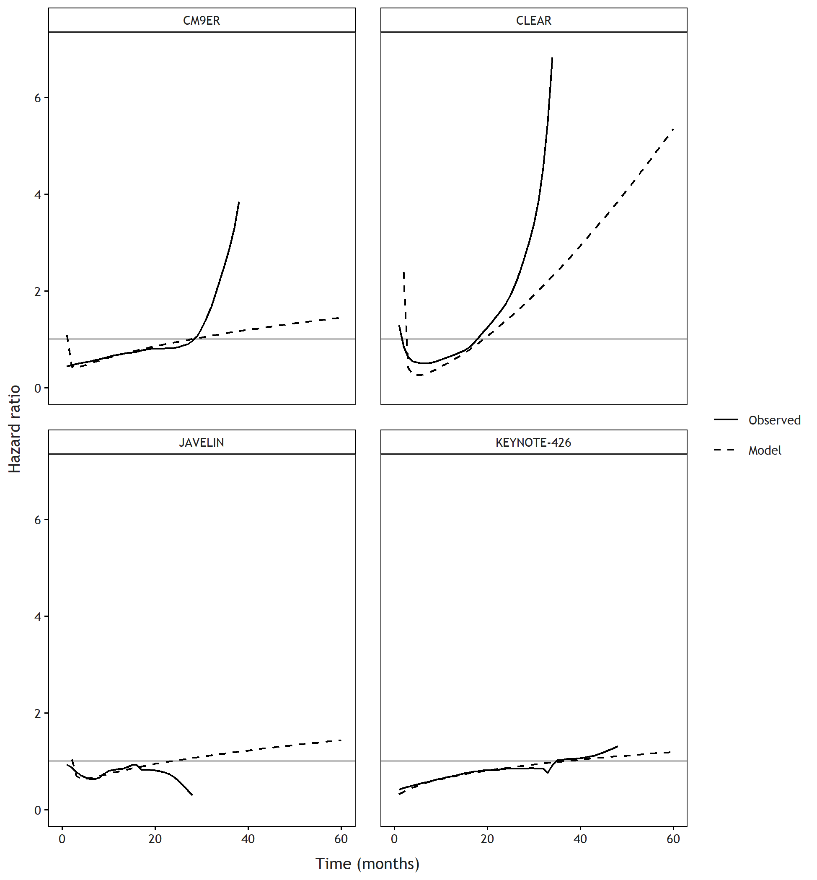


Figure 6: FP(-2,0) (fixed effects).


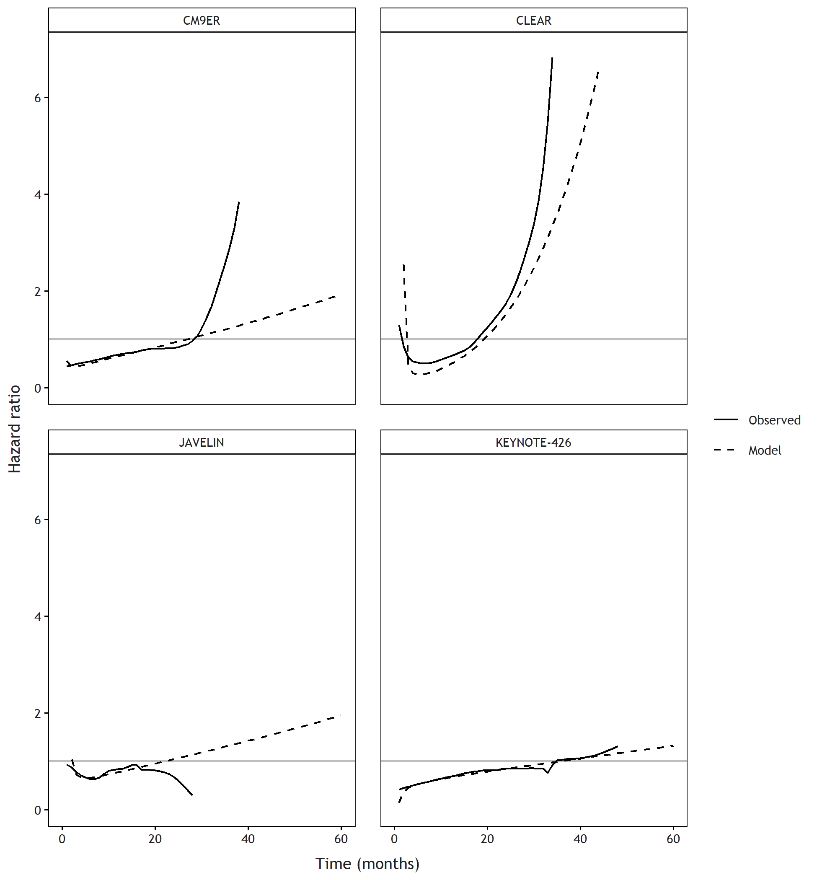


Figure 7: FP(-2,0.5) (fixed effects).


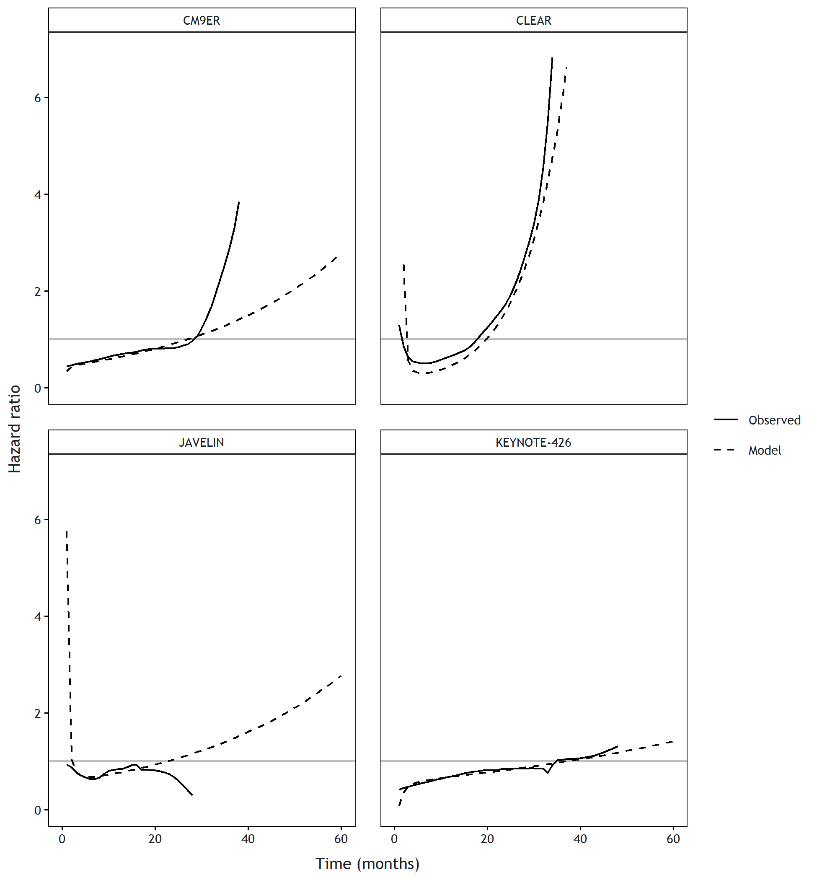


Figure 8: FP(-2,1) (fixed effects).


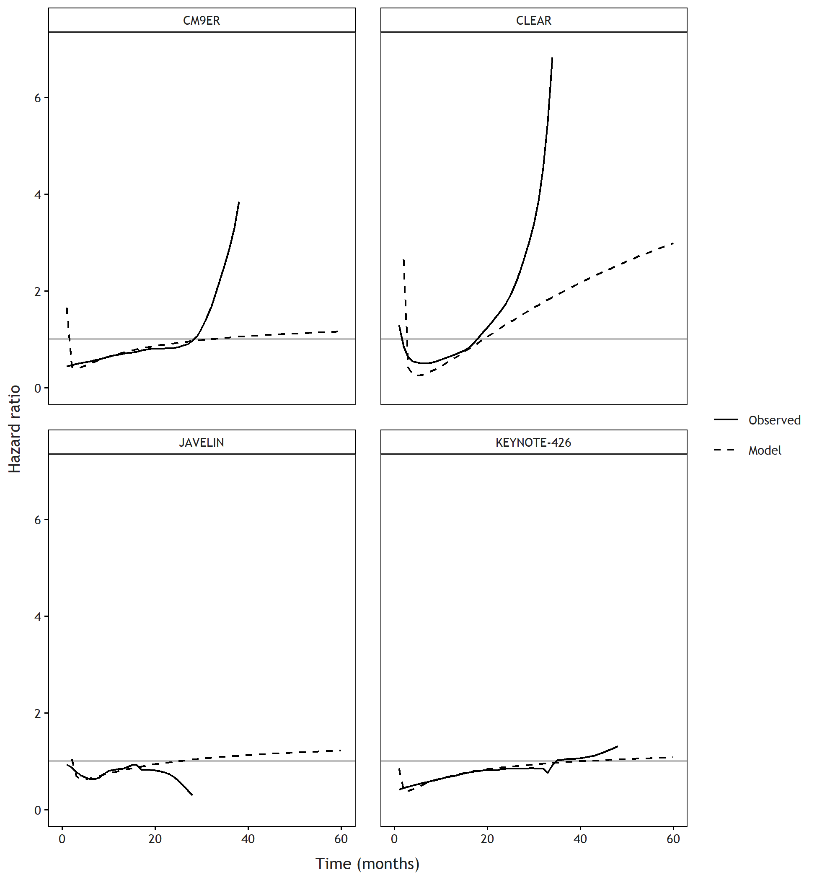


Figure 9: FP(-1,-1) (fixed effects).


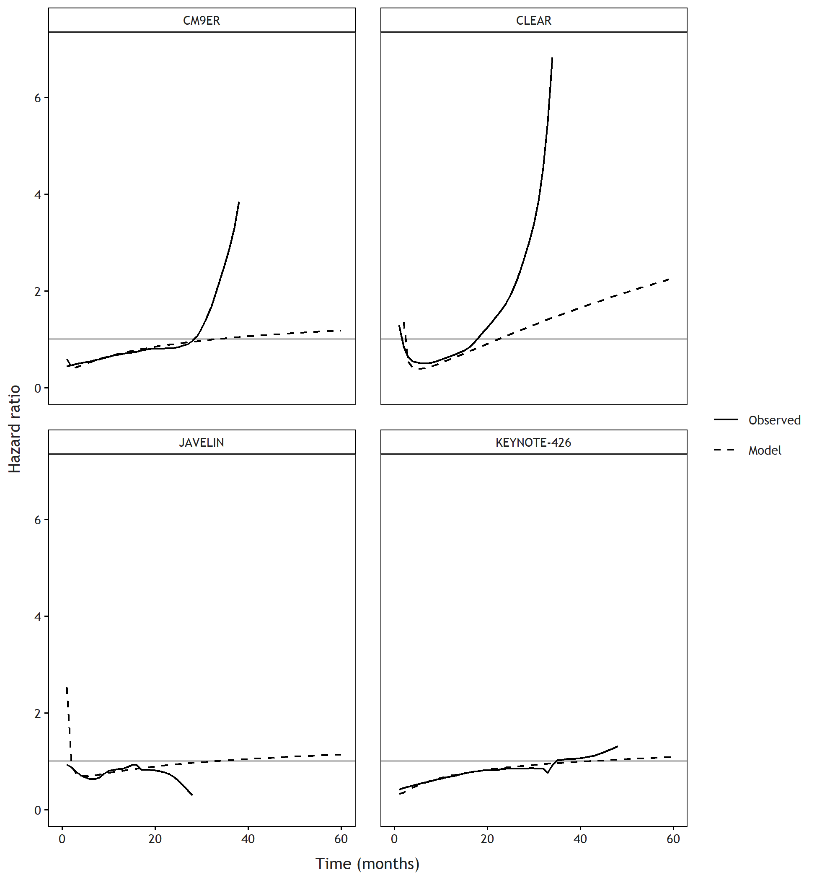


Figure 10: FP(-1,-0.5) (fixed effects).


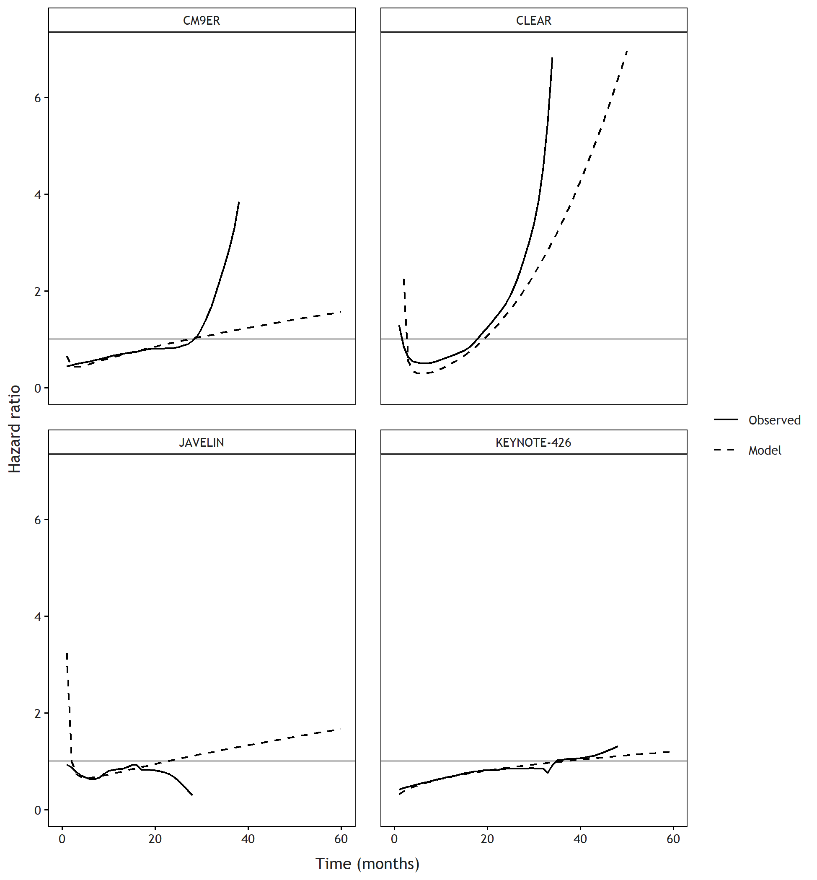


Figure 11: FP(-1,0) (fixed effects).


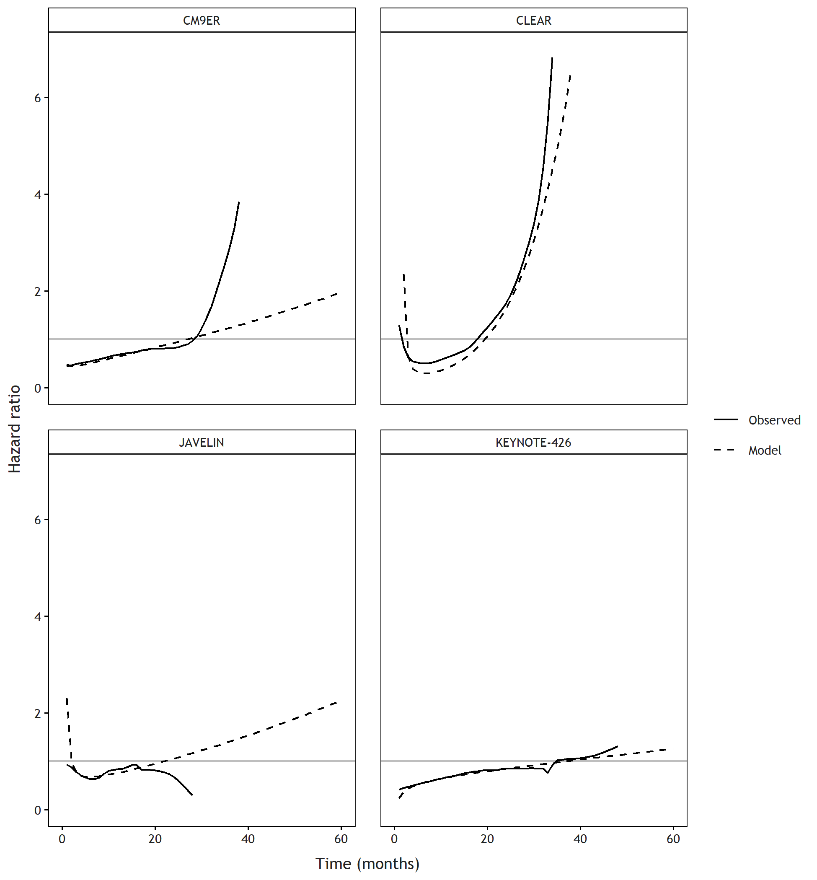


Figure 12: FP(-1,0.5) (fixed effects).


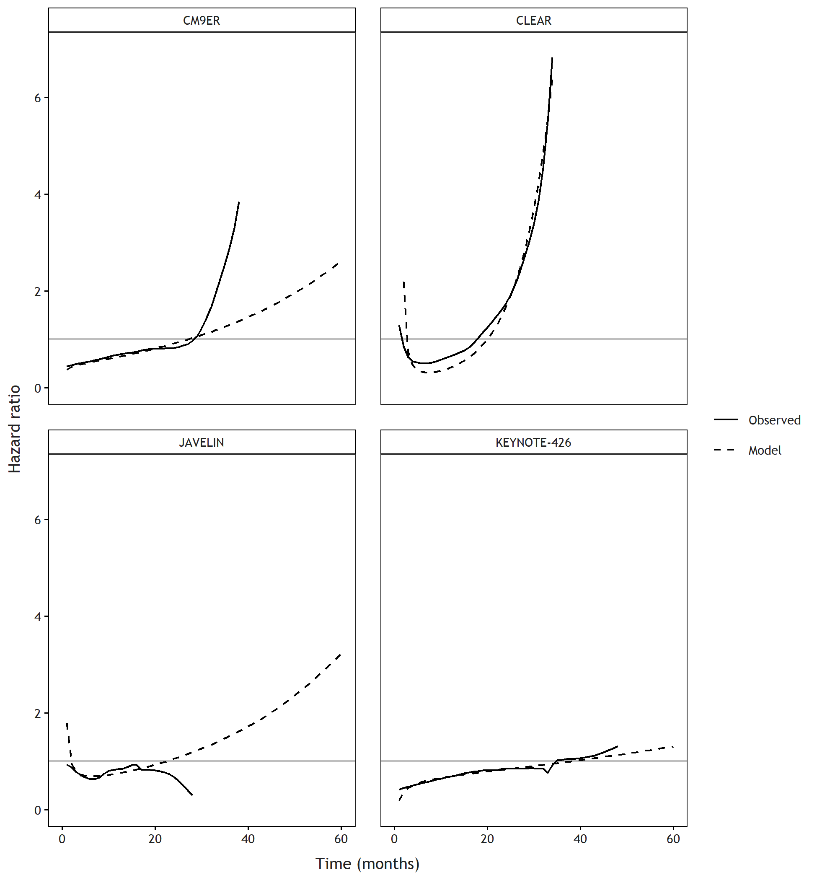


Figure 13: FP(-1,1) (fixed effects).


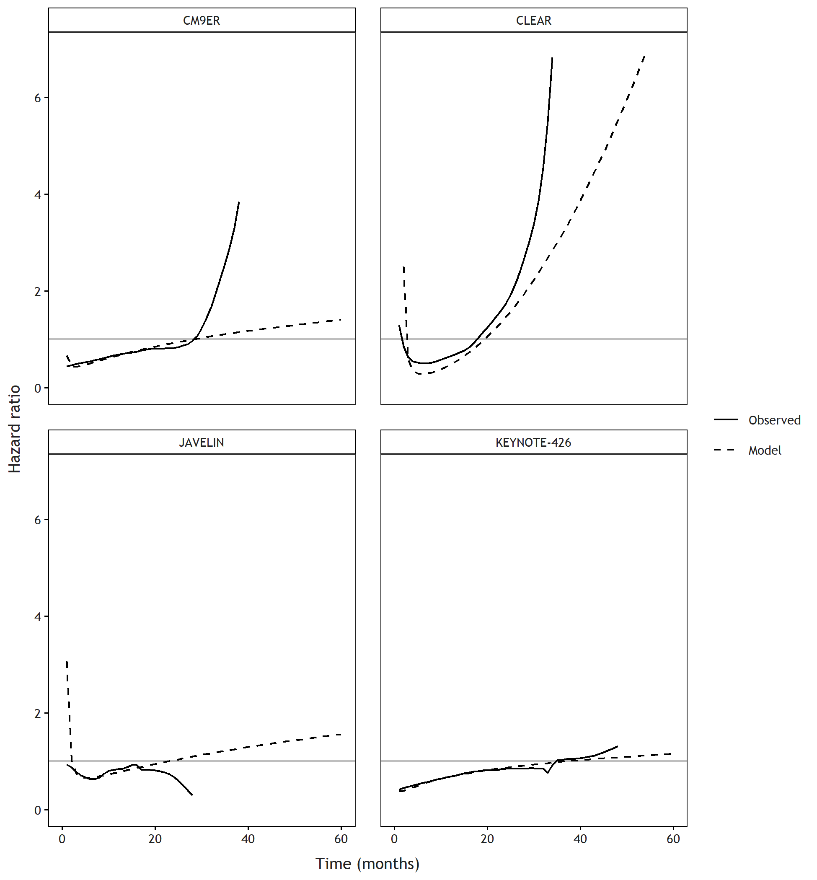


Figure 14: FP(-0.5,-0.5) (fixed effects).


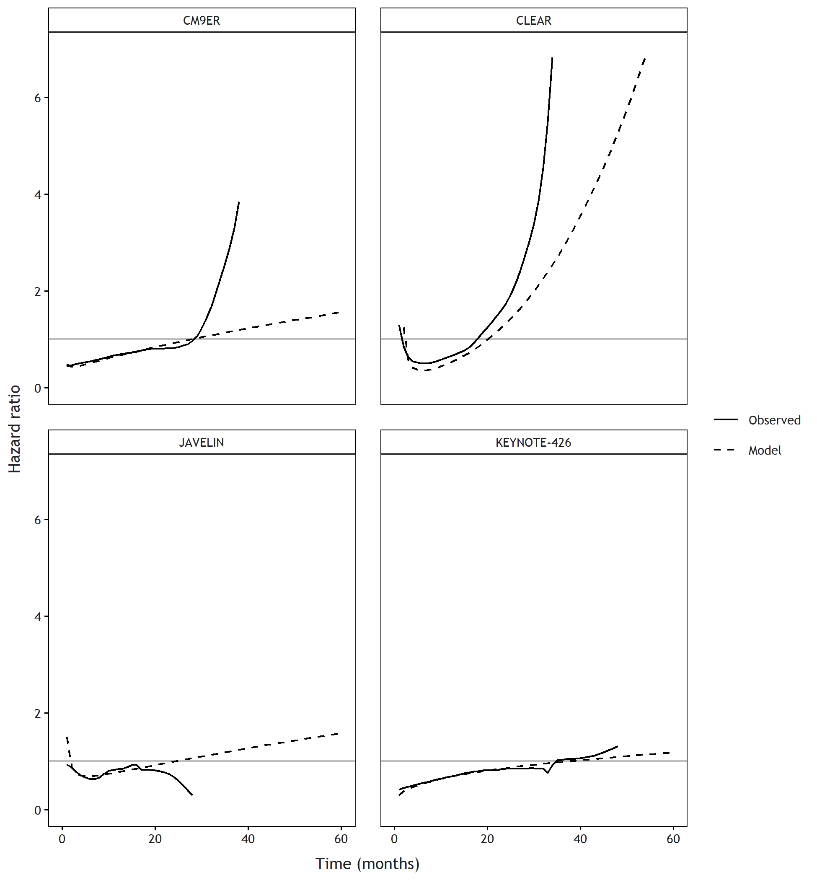


Figure 15: FP(-0.5,0) (fixed effects).


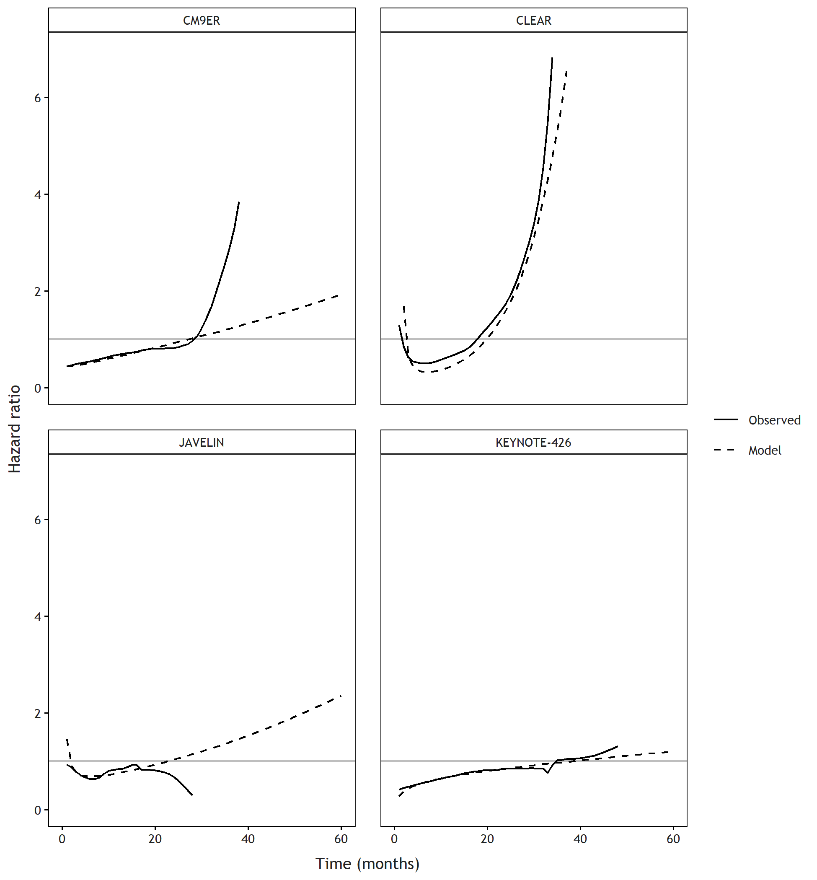


Figure 16: FP(-0.5,0.5) (fixed effects).


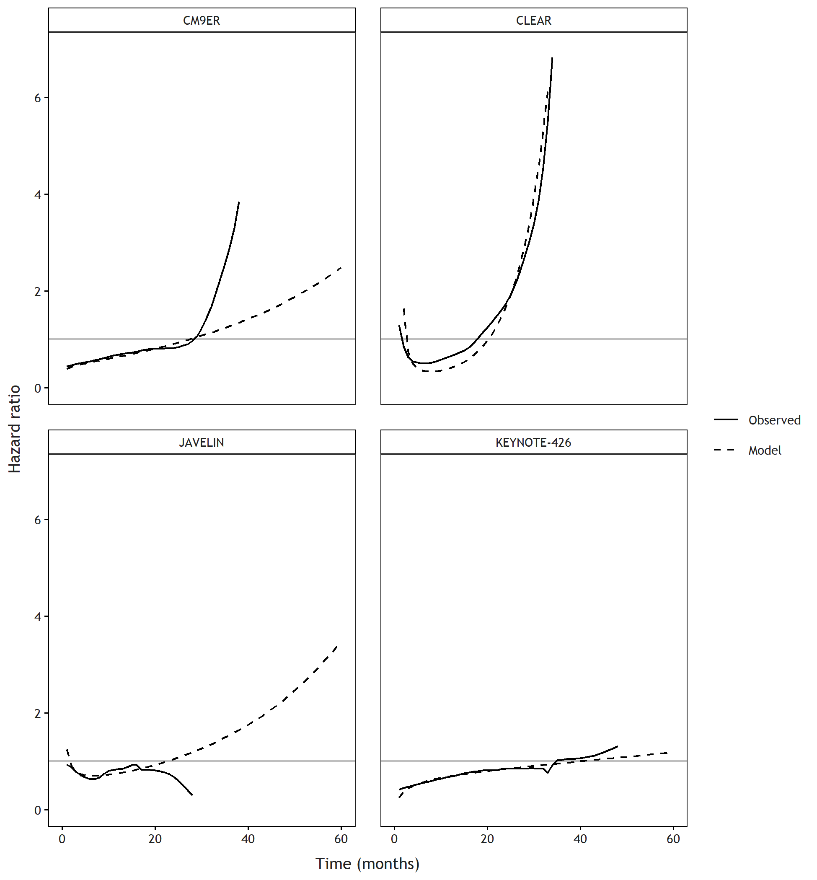


Figure 17: FP(-0.5,1) (fixed effects).


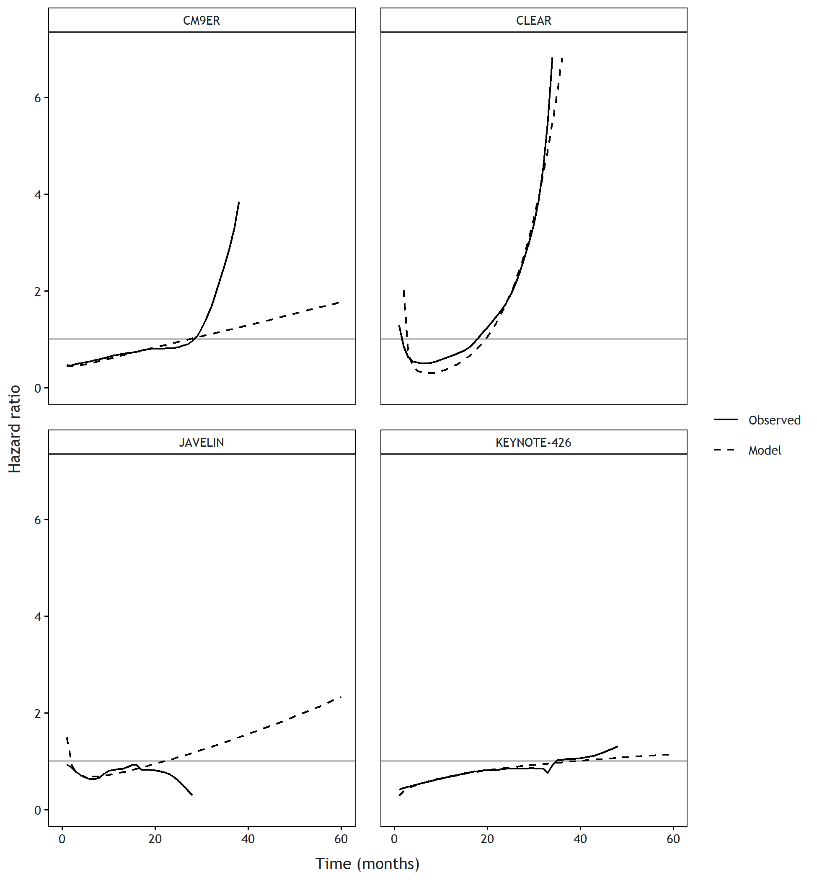


Figure 18: FP(0,0) (fixed effects).


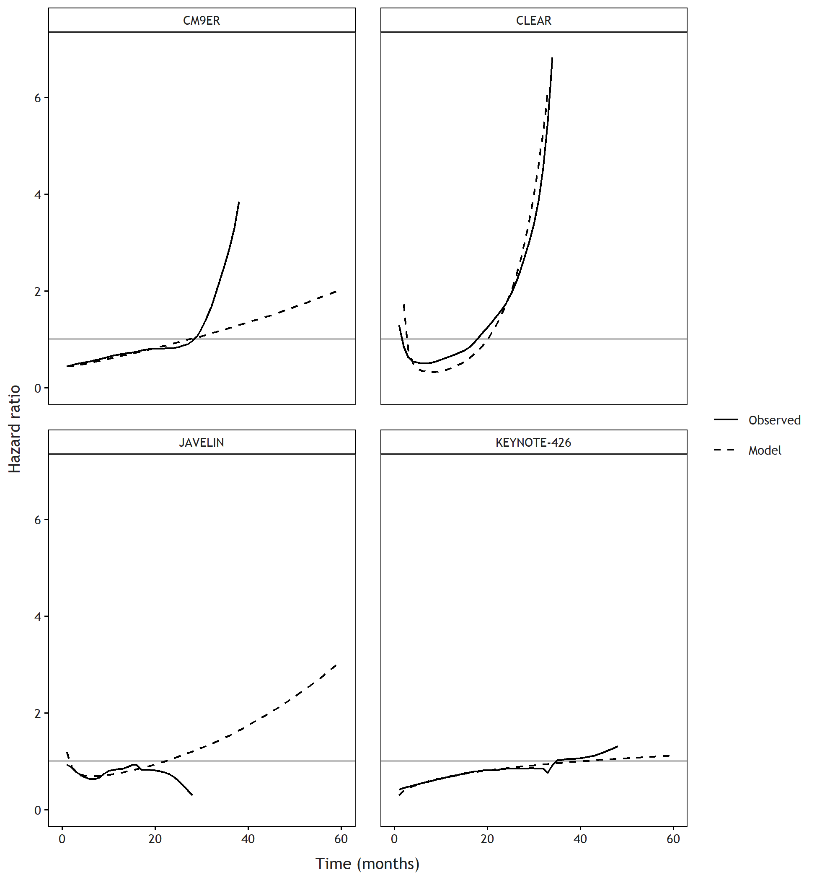


Figure 19: FP(0,0.5) (fixed effects).


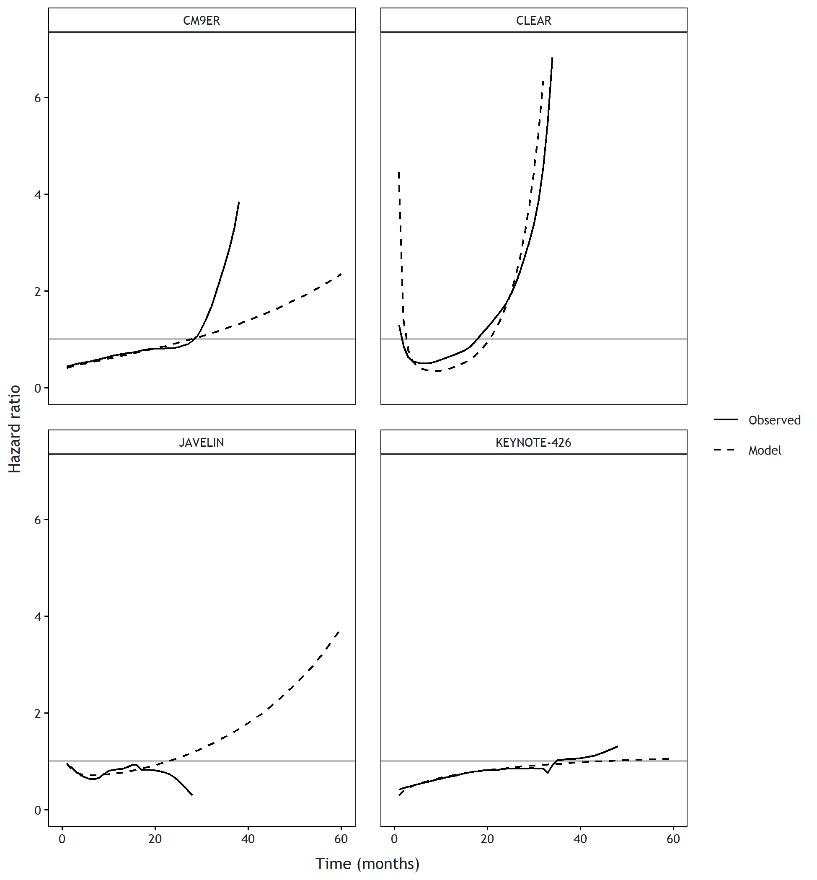


Figure 20: FP(0,1) (fixed effects).


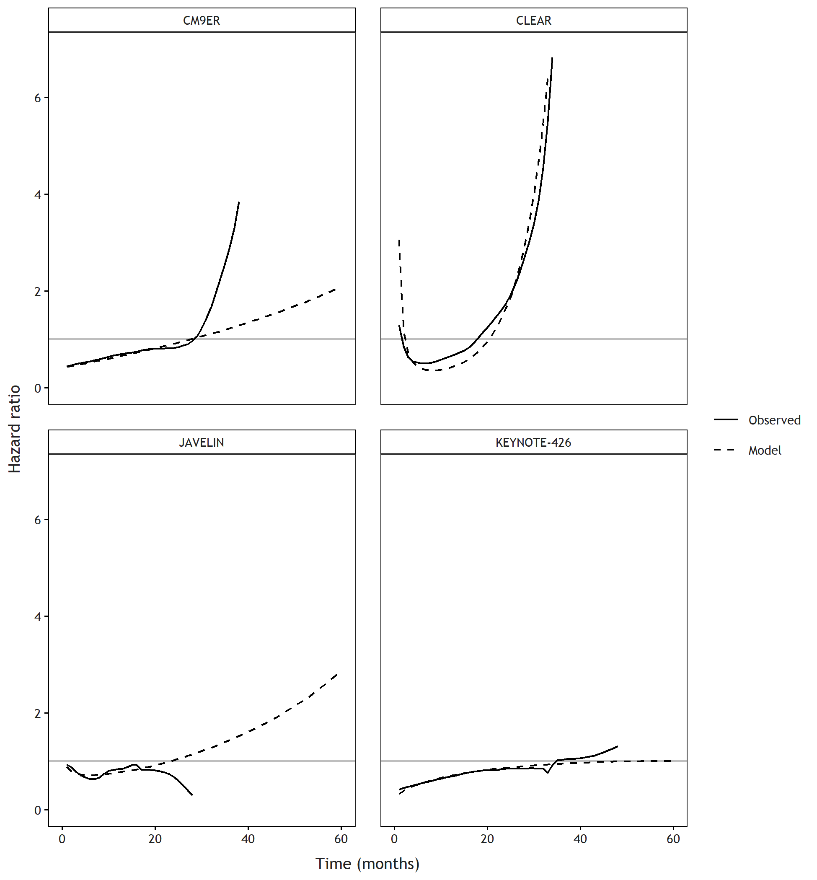


Figure 21: FP(0.5,0.5) (fixed effects).


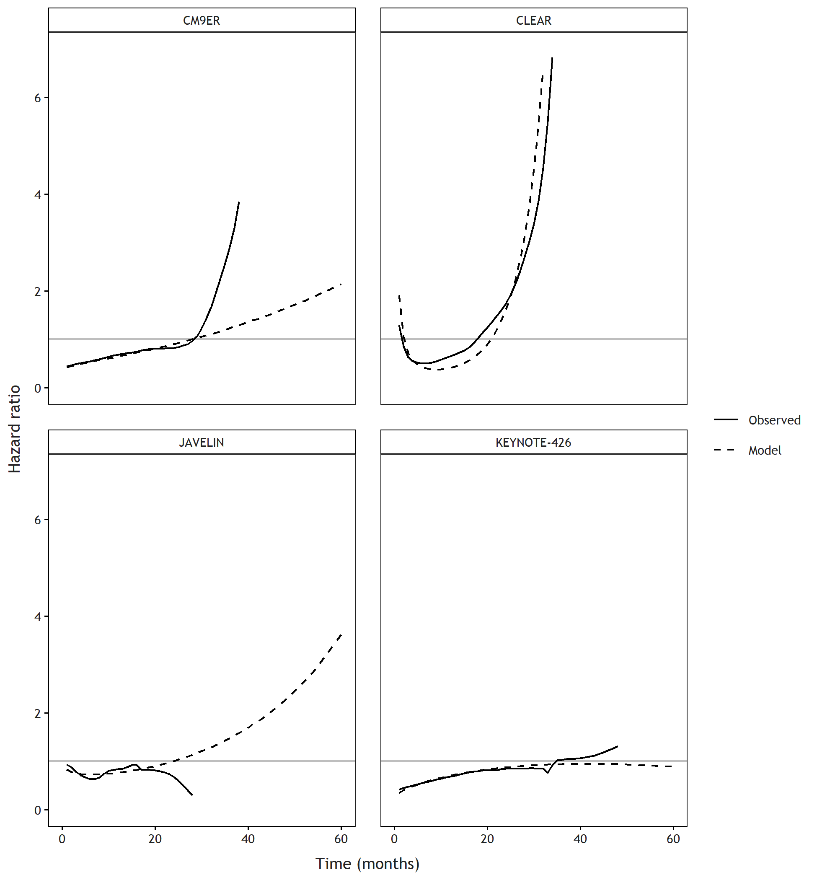


Figure 22: FP(0.5,1) (fixed effects).


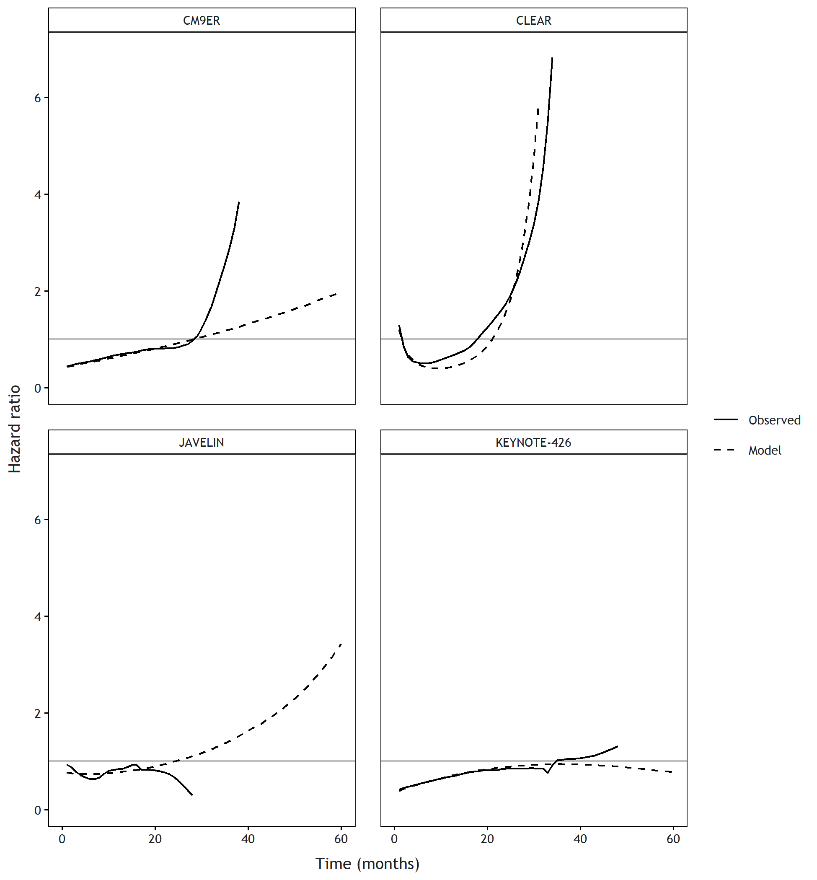


Figure 23: FP(1,1) (fixed effects).

## Model selection algorithm: Predictive accuracy against trial data

Models passing the face validity check were assessed for predictive accuracy against trial data comparing observed versus predicted absolute survival at 2 years, median survival, and restricted mean survival.

### PFS

Table 5. Comparison of 2-year survival outcomes between trials and NMA models

|  | SUN | PEM + LEN | NIV + CAB | AVE + AXI | PEM + AXI |
| --- | --- | --- | --- | --- | --- |
| CLEAR | 18.1% (13.1%, 25.0%) | 46.1% (40.1%, 53.1%) |  |  |  |
| CheckMate 9ER | 19.6% (15.1%, 25.3%) |  | 38.8% (33.6%, 44.9%) |  |  |
| JAVELIN Renal 101 | 19.1% (13.0%, 28.1%) |  |  | 29.1% (22.3%, 37.9%) |  |
| KEYNOTE-426 | 24.3% (20.1%, 29.5%) |  |  |  | 38.3% (33.7%, 43.5%) |
| FP(-2) (fixed effects) | 18.57% | 49.25% | 41.50% | 31.81% | 34.94% |
| FP(-2,-2) (fixed effects) | 20.86% | 50.55% | 41.21% | 33.62% | 34.86% |
| FP(-2,-1) (fixed effects) | 21.35% | 50.41% | 40.95% | 33.88% | 35.04% |
| FP(-2,-0.5) (fixed effects) | 21.68% | 50.24% | 40.73% | 33.87% | 35.21% |
| FP(-2,0) (fixed effects) | 21.80% | 50.14% | 40.52% | 33.57% | 35.24% |
| FP(-2,0.5) (fixed effects) | 21.70% | 50.28% | 40.60% | 33.19% | 35.20% |
| FP(-2,1) (fixed effects) | 21.57% | 50.40% | 40.69% | 32.49% | 35.35% |
| FP(-2,2) (fixed effects) | 21.16% | 51.26% | 41.70% | 30.74% | 35.61% |
| FP(-1) (fixed effects) | 18.71% | 48.94% | 41.19% | 31.67% | 34.40% |
| FP(-1,-1) (fixed effects) | 21.70% | 50.13% | 40.37% | 33.95% | 35.09% |
| FP(-1,-0.5) (fixed effects) | 21.38% | 50.02% | 40.51% | 33.83% | 34.83% |
| FP(-1,0) (fixed effects) | 21.54% | 49.93% | 40.12% | 33.29% | 35.05% |
| FP(-1,0.5) (fixed effects) | 21.40% | 49.90% | 40.09% | 32.83% | 35.00% |
| FP(-1,1) (fixed effects) | 21.09% | 50.12% | 40.16% | 32.09% | 35.06% |
| FP(-1,2) (fixed effects) | 20.70% | 50.73% | 41.30% | 30.20% | 35.07% |
| FP(-0.5) (fixed effects) | 19.11% | 48.84% | 41.07% | 31.81% | 34.34% |
| FP(-0.5,-0.5) (fixed effects) | 21.49% | 50.00% | 40.00% | 33.28% | 34.94% |
| FP(-0.5,0) (fixed effects) | 21.26% | 49.75% | 40.03% | 32.98% | 34.79% |
| FP(-0.5,0.5) (fixed effects) | 21.12% | 49.86% | 39.91% | 32.41% | 34.84% |
| FP(-0.5,1) (fixed effects) | 20.91% | 50.06% | 40.08% | 31.84% | 34.82% |
| FP(-0.5,2) (fixed effects) | 20.58% | 50.51% | 41.14% | 30.27% | 34.78% |
| FP(0) (fixed effects) | 19.73% | 48.90% | 40.98% | 32.01% | 34.47% |
| FP(0,0) (fixed effects) | 21.14% | 49.74% | 39.60% | 32.59% | 34.78% |
| FP(0,0.5) (fixed effects) | 20.94% | 49.86% | 39.73% | 31.97% | 34.72% |
| FP(0,1) (fixed effects) | 20.76% | 50.04% | 40.06% | 31.45% | 34.60% |
| FP(0,2) (fixed effects) | 20.63% | 50.38% | 41.25% | 30.35% | 34.65% |
| FP(0.5) (fixed effects) | 20.35% | 49.33% | 41.09% | 32.07% | 34.73% |
| FP(0.5,0.5) (fixed effects) | 20.80% | 49.73% | 40.03% | 31.62% | 34.57% |
| FP(0.5,1) (fixed effects) | 20.73% | 49.96% | 40.45% | 31.41% | 34.46% |
| FP(0.5,2) (fixed effects) | 20.84% | 50.21% | 41.61% | 30.61% | 34.80% |
| FP(1) (fixed effects) | 20.73% | 49.94% | 40.93% | 31.88% | 34.98% |
| FP(1,1) (fixed effects) | 20.84% | 50.02% | 40.86% | 31.20% | 34.62% |
| FP(1,2) (fixed effects) | 21.11% | 50.08% | 41.88% | 30.78% | 34.87% |
| FP(2) (fixed effects) | 20.92% | 51.40% | 41.33% | 30.30% | 35.10% |
| FP(2,2) (fixed effects) | 21.61% | 50.16% | 42.40% | 31.35% | 35.14% |
| loglogistic (fixed effects) | 19.99% | 49.37% | 37.78% | 34.51% | 32.82% |
| lognormal (fixed effects) | 20.04% | 50.10% | 37.70% | 35.31% | 33.30% |

Table 6. Comparison of median survival outcomes between trials and NMA models

|  | SUN | PEM + LEN | NIV + CAB | AVE + AXI | PEM + AXI |
| --- | --- | --- | --- | --- | --- |
| CLEAR | 7.7  (5.8, 10.3) | 22.8  (19.7, 26.3) |  |  |  |
| CheckMate 9ER | 8.5  (6.9, 9.3) |  | 16.6  (13.0, 19.9) |  |  |
| JAVELIN Renal 101 | 7.1  (6.1, 9.6) |  |  | 12.3  (10.1, 15.1) |  |
| KEYNOTE-426 | 10.1  (8.9, 12.9) |  |  |  | 15.5  (13.9, 19.8) |
| FP(-2) (fixed effects) | 10.80 | 23.90 | 19.70 | 15.30 | 16.80 |
| FP(-2,-2) (fixed effects) | 10.50 | 24.90 | 19.20 | 15.10 | 15.40 |
| FP(-2,-1) (fixed effects) | 10.20 | 24.80 | 19.00 | 14.90 | 15.10 |
| FP(-2,-0.5) (fixed effects) | 10.10 | 24.60 | 18.90 | 14.60 | 14.90 |
| FP(-2,0) (fixed effects) | 10.10 | 24.50 | 18.90 | 14.50 | 14.80 |
| FP(-2,0.5) (fixed effects) | 10.10 | 24.50 | 19.00 | 14.40 | 14.80 |
| FP(-2,1) (fixed effects) | 10.10 | 24.60 | 19.10 | 14.40 | 15.00 |
| FP(-2,2) (fixed effects) | 10.30 | 25.10 | 19.70 | 14.50 | 15.40 |
| FP(-1) (fixed effects) | 10.20 | 23.70 | 19.50 | 14.80 | 16.30 |
| FP(-1,-1) (fixed effects) | 10.00 | 24.70 | 18.70 | 14.60 | 14.70 |
| FP(-1,-0.5) (fixed effects) | 10.10 | 24.50 | 18.70 | 14.50 | 14.70 |
| FP(-1,0) (fixed effects) | 9.90 | 24.40 | 18.70 | 14.30 | 14.60 |
| FP(-1,0.5) (fixed effects) | 9.90 | 24.30 | 18.80 | 14.20 | 14.70 |
| FP(-1,1) (fixed effects) | 9.90 | 24.40 | 19.00 | 14.10 | 14.80 |
| FP(-1,2) (fixed effects) | 10.00 | 24.70 | 19.50 | 14.20 | 15.10 |
| FP(-0.5) (fixed effects) | 9.90 | 23.60 | 19.20 | 14.50 | 16.00 |
| FP(-0.5,-0.5) (fixed effects) | 9.90 | 24.60 | 18.60 | 14.20 | 14.60 |
| FP(-0.5,0) (fixed effects) | 9.90 | 24.30 | 18.60 | 14.10 | 14.60 |
| FP(-0.5,0.5) (fixed effects) | 9.80 | 24.20 | 18.70 | 14.00 | 14.60 |
| FP(-0.5,1) (fixed effects) | 9.70 | 24.30 | 18.80 | 14.00 | 14.60 |
| FP(-0.5,2) (fixed effects) | 9.60 | 24.50 | 19.20 | 14.00 | 14.70 |
| FP(0) (fixed effects) | 9.00 | 23.60 | 18.50 | 13.90 | 14.20 |
| FP(0,0) (fixed effects) | 9.77 | 23.93 | 18.20 | 13.95 | 14.60 |
| FP(0,0.5) (fixed effects) | 9.60 | 24.00 | 13.80 | 18.20 | 14.40 |
| FP(0,1) (fixed effects) | 9.50 | 24.10 | 13.70 | 18.30 | 14.40 |
| FP(0,2) (fixed effects) | 9.30 | 24.30 | 13.70 | 18.70 | 14.20 |
| FP(0.5) (fixed effects) | 9.00 | 23.70 | 13.80 | 18.50 | 14.00 |
| FP(0.5,0.5) (fixed effects) | 9.40 | 23.90 | 13.70 | 18.40 | 14.30 |
| FP(0.5,1) (fixed effects) | 9.20 | 24.00 | 13.60 | 18.50 | 14.10 |
| FP(0.5,2) (fixed effects) | 9.10 | 24.10 | 13.80 | 18.90 | 14.00 |
| FP(1) (fixed effects) | 9.00 | 24.00 | 13.80 | 18.30 | 13.90 |
| FP(1,1) (fixed effects) | 9.10 | 24.00 | 13.70 | 18.70 | 14.00 |
| FP(1,2) (fixed effects) | 8.90 | 24.00 | 13.80 | 18.90 | 13.80 |
| FP(2) (fixed effects) | 9.10 | 24.90 | 13.90 | 18.40 | 13.90 |
| FP(2,2) (fixed effects) | 8.80 | 24.00 | 13.80 | 18.80 | 13.60 |
| loglogistic (fixed effects) | 9.10 | 23.87 | 16.40 | 14.79 | 13.71 |
| lognormal (fixed effects) | 9.51 | 24.45 | 16.59 | 15.50 | 14.32 |

NA, not available

Table 7. Comparison of restricted mean survival at 32.1 months between trials and NMA models

|  | SUN | PEM + LEN | NIV + CAB | AVE + AXI | PEM + AXI |
| --- | --- | --- | --- | --- | --- |
| CLEAR | 10.9 | 17.2 |  |  |  |
| CheckMate 9ER | 10.8 |  | 15.3 |  |  |
| JAVELIN Renal 101 | 10.5 |  |  | 13.3 |  |
| KEYNOTE-426 | 12.4 |  |  |  | 15.1 |
| FP(-2) (fixed effects) | 12.32 | 17.89 | 16.71 | 14.93 | 15.69 |
| FP(-2,-2) (fixed effects) | 12.46 | 17.92 | 16.45 | 14.86 | 15.05 |
| FP(-2,-1) (fixed effects) | 12.40 | 17.95 | 16.42 | 14.80 | 14.99 |
| FP(-2,-0.5) (fixed effects) | 12.35 | 17.96 | 16.42 | 14.74 | 14.97 |
| FP(-2,0) (fixed effects) | 12.33 | 17.98 | 16.42 | 14.71 | 14.96 |
| FP(-2,0.5) (fixed effects) | 12.31 | 18.02 | 16.49 | 14.68 | 14.99 |
| FP(-2,1) (fixed effects) | 12.31 | 18.02 | 16.54 | 14.66 | 15.06 |
| FP(-2,2) (fixed effects) | 12.31 | 18.07 | 16.71 | 14.66 | 15.23 |
| FP(-1) (fixed effects) | 11.84 | 17.87 | 16.55 | 14.62 | 15.29 |
| FP(-1,-1) (fixed effects) | 12.31 | 17.95 | 16.37 | 14.71 | 14.91 |
| FP(-1,-0.5) (fixed effects) | 12.28 | 17.90 | 16.37 | 14.69 | 14.92 |
| FP(-1,0) (fixed effects) | 12.21 | 17.91 | 16.37 | 14.61 | 14.91 |
| FP(-1,0.5) (fixed effects) | 12.16 | 17.91 | 16.41 | 14.55 | 14.92 |
| FP(-1,1) (fixed effects) | 12.09 | 17.93 | 16.45 | 14.49 | 14.94 |
| FP(-1,2) (fixed effects) | 11.96 | 17.95 | 16.57 | 14.41 | 14.97 |
| FP(-0.5) (fixed effects) | 11.64 | 17.83 | 16.34 | 14.36 | 15.01 |
| FP(-0.5,-0.5) (fixed effects) | 12.20 | 17.91 | 16.32 | 14.58 | 14.90 |
| FP(-0.5,0) (fixed effects) | 12.12 | 17.87 | 16.32 | 14.52 | 14.87 |
| FP(-0.5,0.5) (fixed effects) | 12.01 | 17.86 | 16.33 | 14.44 | 14.83 |
| FP(-0.5,1) (fixed effects) | 11.89 | 17.87 | 16.33 | 14.38 | 14.80 |
| FP(-0.5,2) (fixed effects) | 11.67 | 17.85 | 16.39 | 14.26 | 14.72 |
| FP(0) (fixed effects) | 11.14 | 17.73 | 15.85 | 13.94 | 14.00 |
| FP(0,0) (fixed effects) | 11.98 | 17.82 | 16.22 | 14.40 | 14.80 |
| FP(0,0.5) (fixed effects) | 11.81 | 17.71 | 15.95 | 14.23 | 14.69 |
| FP(0,1) (fixed effects) | 11.63 | 17.72 | 15.87 | 14.09 | 14.56 |
| FP(0,2) (fixed effects) | 11.39 | 17.71 | 15.86 | 13.91 | 14.32 |
| FP(0.5) (fixed effects) | 11.20 | 17.68 | 15.77 | 13.92 | 13.97 |
| FP(0.5,0.5) (fixed effects) | 11.59 | 17.66 | 15.89 | 14.07 | 14.48 |
| FP(0.5,1) (fixed effects) | 11.43 | 17.65 | 15.83 | 13.97 | 14.31 |
| FP(0.5,2) (fixed effects) | 11.29 | 17.62 | 15.80 | 13.87 | 14.14 |
| FP(1) (fixed effects) | 11.23 | 17.66 | 15.71 | 13.94 | 14.00 |
| FP(1,1) (fixed effects) | 11.33 | 17.62 | 15.79 | 13.89 | 14.16 |
| FP(1,2) (fixed effects) | 11.25 | 17.56 | 15.74 | 13.85 | 14.02 |
| FP(2) (fixed effects) | 11.31 | 17.62 | 15.74 | 13.96 | 14.09 |
| FP(2,2) (fixed effects) | 11.22 | 17.53 | 15.66 | 13.85 | 13.93 |
| loglogistic (fixed effects) | 11.44 | 17.81 | 15.23 | 14.62 | 14.10 |
| lognormal (fixed effects) | 11.75 | 17.89 | 15.41 | 15.03 | 14.46 |

### OS

Table 8. Comparison of 2-year survival outcomes between trials and NMA models

|  | SUN | PEM + LEN | NIV + CAB | AVE + AXI | PEM + AXI |
| --- | --- | --- | --- | --- | --- |
| CLEAR | 68.8% (63.8%, 74.3%) | 77.5% (72.8%, 82.5%) |  |  |  |
| CheckMate 9ER | 60.2% (55.0%, 65.8%) |  | 70.1% (65.3%, 75.4%) |  |  |
| JAVELIN | 60.4% (54.1%, 67.5%) |  |  | 64.1% (57.5%, 71.4%) |  |
| KEYNOTE-426 | 65.9% (61.5%, 70.5%) |  |  |  | 74.5% (70.5%, 78.8%) |
| FP(-2) (fixed effects) | 58.49% | 17.06% | 70.54% | 62.83% | 69.92% |
| FP(-1) (fixed effects) | 59.42% | 68.67% | 70.67% | 66.26% | 70.85% |
| FP(-0.5) (fixed effects) | 59.56% | 70.17% | 70.85% | 66.50% | 71.32% |
| FP(0) (fixed effects) | 59.60% | 70.33% | 71.11% | 66.38% | 71.64% |
| FP(0.5) (fixed effects) | 59.58% | 70.23% | 71.44% | 66.23% | 71.65% |
| FP(1) (fixed effects) | 59.61% | 70.24% | 71.80% | 66.08% | 71.49% |
| loglogistic (fixed effects) | 59.40% | 66.67% | 70.75% | 63.60% | 67.86% |
| lognormal (fixed effects) | 59.49% | 68.23% | 70.27% | 64.19% | 67.70% |

Table 9. Comparison of median survival outcomes between trials and NMA models

|  | SUN | PEM + LEN | NIV + CAB | AVE + AXI | PEM + AXI |
| --- | --- | --- | --- | --- | --- |
| CLEAR | NA  (NA, NA) | NA  (32.6, NA) |  |  |  |
| CheckMate 9ER | 33.0  (29.0, NA) |  | 36.1  (35.5, NA) |  |  |
| JAVELIN | 26.7  (25.3, NA) |  |  | 29.5  (26.0, NA) |  |
| KEYNOTE-426 | 40.0  (35.0, 42.9) |  |  |  | 44.2  (42.7, 47.5) |
| FP(-2) (fixed effects) | 33.4 | 46.5 | 46.1 | 41.6 | 44.3 |
| FP(-1) (fixed effects) | 33 | 45.3 | 45 | 40.4 | 44.4 |
| FP(-0.5) (fixed effects) | 32.6 | 44.1 | 44.1 | 39.5 | 44.3 |
| FP(0) (fixed effects) | 34.2 | NA | 42.7 | 42.4 | 45.6 |
| FP(0.5) (fixed effects) | 33.1 | 37.6 | 41.7 | 39.4 | 44.8 |
| FP(1) (fixed effects) | 33.2 | 34.6 | 40.9 | 38.3 | 44.9 |
| loglogistic (fixed effects) | 34 | 40.6 | 45.9 | 39.5 | 42.8 |
| lognormal (fixed effects) | 35.2 | 49.8 | 48.8 | 43 | 45 |

Table 10. Comparison of restricted mean survival at 32.1 months between trials and NMA models

|  | SUN; | PEM + LEN | NIV + CAB | AVE + AXI | PEM + AXI |
| --- | --- | --- | --- | --- | --- |
| CLEAR | 23.8 | 26.1 |  |  |  |
| CheckMate 9ER | 21.9 |  | 24.6 |  |  |
| JAVELIN | 22.5 |  |  | 23.7 |  |
| KEYNOTE-426 | 23.2 |  |  |  | 25.3 |
| FP(-2) (fixed effects) | 22.65 | 24.56 | 24.71 | 24.10 | 24.67 |
| FP(-1) (fixed effects) | 22.52 | 24.61 | 24.79 | 24.01 | 24.90 |
| FP(-0.5) (fixed effects) | 22.37 | 24.64 | 24.83 | 23.94 | 24.95 |
| FP(0) (fixed effects) | 21.64 | 24.61 | 24.84 | 23.31 | 24.83 |
| FP(0.5) (fixed effects) | 21.80 | 24.78 | 24.84 | 23.41 | 24.71 |
| FP(1) (fixed effects) | 21.90 | 24.85 | 24.86 | 23.43 | 24.61 |
| loglogistic (fixed effects) | 21.75 | 23.80 | 24.80 | 22.74 | 24.06 |
| lognormal (fixed effects) | 21.98 | 23.90 | 24.72 | 22.94 | 24.10 |

# References

1. Choueiri TK, Powles T, Burotto M, et al. Nivolumab plus Cabozantinib versus Sunitinib for Advanced Renal-Cell Carcinoma. New England Journal of Medicine. 2021;384(9):829-841.

2. Motzer RJ, Penkov K, Haanen J, et al. Avelumab plus Axitinib versus Sunitinib for Advanced Renal-Cell Carcinoma. N Engl J Med. 2019 Mar 21;380(12):1103-1115.

3. Rini BI, Plimack ER, Stus V, et al. Pembrolizumab plus Axitinib versus Sunitinib for Advanced Renal-Cell Carcinoma. N Engl J Med. 2019 Mar 21;380(12):1116-1127.

4. Motzer R, Alekseev B, Rha S-Y, et al. Lenvatinib plus pembrolizumab or everolimus for advanced renal cell carcinoma. New England Journal of Medicine. 2021;384(14):1289-1300.

5. Choueiri TK, Motzer RJ, Rini BI, et al. Updated efficacy results from the JAVELIN renal 101 trial: First-line avelumab plus axitinib versus sunitinib in patients with advanced renal cell carcinoma. Annals of Oncology. 2020.

6. Rini BI, Plimack ER, Stus V, et al. Pembrolizumab (pembro) plus axitinib (axi) versus sunitinib as first-line therapy for advanced clear cell renal cell carcinoma (ccRCC): Results from 42-month follow-up of KEYNOTE-426. Journal of Clinical Oncology. 2021;39(15_suppl):4500-4500.

7. RStan: the R interface to Stan [22 December 2021]. Available from: //mc-stan.org/users/interfaces/rstan

8. Dias S, Welton NJ, Sutton AJ, et al. NICE DSU technical support document 2: a generalised linear modelling framework for pairwise and network meta-analysis of randomised controlled trials. 2011.

9. Higgins JP, Green S. Cochrane handbook for systematic reviews of interventions. Vol. 4. John Wiley & Sons; 2011.

10. Spiegelhalter D, Thomas A, Best N, et al. WinBUGS user manual. version; 2003.
